# Supplementary material for: Post-COVID-19 Pandemic Rebound of Macrolide-Resistant Mycoplasma pneumoniae Infection: A Descriptive Study
Source: MDPI journal article supplement (doi:10.3390/antibiotics13030262), 2024-03-15
Supplement: s1 [file s1]

**Supplementary Table S1.** The number of tests received by hospitalized pediatric and adult patients with *M. pneumoniae* infection from September to November 2023.

| Number of patients                                                                 | Children | Adult |
|------------------------------------------------------------------------------------|----------|-------|
| <i>M. pneumoniae</i> PCR only                                                      | 454      | 6     |
| <i>M. pneumoniae</i> PCR with SARS-CoV-2 PCR only                                  | 1        | 3     |
| <i>M. pneumoniae</i> PCR with respiratory viruses multiplex RT-PCR only            | 562      | 44    |
| <i>M. pneumoniae</i> PCR, SARS-CoV-2 PCR, and respiratory viruses multiplex RT-PCR | 32       | 46    |
| Total number of tNGS performed                                                     | 870      | 10    |
| Total number of patients                                                           | 1049     | 99    |

**Supplementary Table S2.** Multivariate analysis on factors associated with hospitalized adult patients infected with *M. pneumoniae*.

|                                                                       | Odds ratio | 95% Confidence Interval | p-value |
|-----------------------------------------------------------------------|------------|-------------------------|---------|
| Female                                                                | 0.544      | 0.304 – 0.974           | 0.040   |
| Underlying medical condition                                          | 14.114     | 6.937 – 28.715          | < 0.001 |
| Fever                                                                 | 0.116      | 0.028 – 0.475           | 0.003   |
| Fatigue                                                               | 8.723      | 2.212 – 34.395          | 0.002   |
| Shortness of breath                                                   | -          | -                       | 0.119   |
| Headache                                                              | -          | -                       | 0.052   |
| Sore throat                                                           | -          | -                       | 0.802   |
| Chest X-ray showing pulmonary infiltrates                             | -          | -                       | 0.054   |
| CRP level                                                             | 1.047      | 1.036 – 1.058           | < 0.001 |
| Other respiratory pathogens detected by tNGS or pathogen-specific PCR | 0.048      | 0.011 – 0.221           | < 0.001 |

**Remarks:** Odds ratio > 1 suggests that factor is more associated with adult patients.
