# Supplementary material for: Post-COVID-19 Pandemic Rebound of Macrolide-Resistant Mycoplasma pneumoniae Infection: A Descriptive Study
Source: MDPI journal article supplement (doi:10.3390/antibiotics13030262), 2024-03-15
Supplement: s1 [file s1]

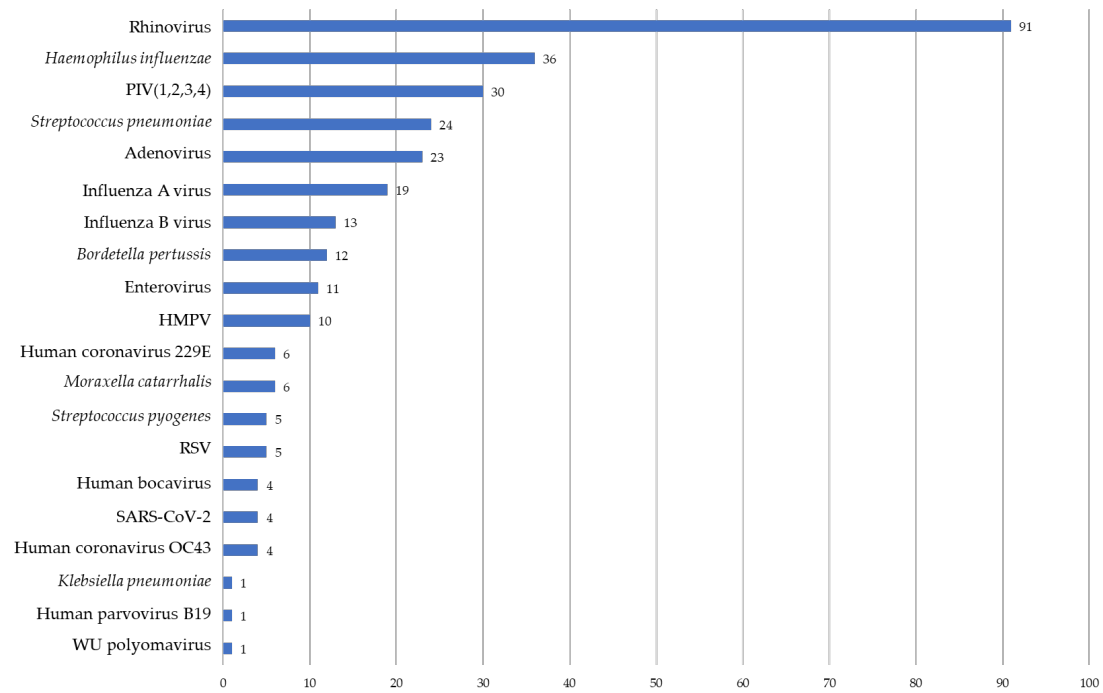

**Supplementary Figure S1.** Number of patients with other respiratory pathogens as identified by tNGS and/or pathogen-specific PCR assay in the 277 hospitalized patients with *M. pneumoniae* infection in this study. Remarks: WU polyomavirus has doubtful pathogenic significance in respiratory infection. PIV: parainfluenza virus; RSV: respiratory syncytial virus; SARS-CoV-2: severe acute respiratory syndrome coronavirus 2; HMPV: human metapneumovirus.
