# Supplementary material for: Post-COVID-19 Pandemic Rebound of Macrolide-Resistant Mycoplasma pneumoniae Infection: A Descriptive Study
Source: Antibiotics (Basel). 2024 Mar 15;13(3):262. doi: 10.3390/antibiotics13030262 (PMC10967482; doi:10.3390/antibiotics13030262)
Supplement: Supplementary file 1 [file antibiotics-13-00262-s001.zip]

Archive with 4 entries (4 files):
- Supplementary Figure S1.pdf
- Supplementary Information S1.xlsx
- Supplementary Information S2.pdf
- Supplementary Tables S1 and S2.pdf
