# Supplementary material for: Post-COVID-19 Pandemic Rebound of Macrolide-Resistant Mycoplasma pneumoniae Infection: A Descriptive Study
Source: Antibiotics (Basel). 2024 Mar 15;13(3):262. doi: 10.3390/antibiotics13030262 (PMC10967482; doi:10.3390/antibiotics13030262)
Supplement: Supplementary file 1 [file antibiotics-13-00262-s001.zip › Supplementary Information S1.xlsx]

## Sheet: Sheet1
Respiratory Pathogens tested from Jan 2023 to Nov 2023 (HKU-SZH）
		Jan			Feb			Mar			Apr			May			Jun			Jul			Aug			Sept			Oct			Nov
Test panel	NPS	No. tested	Pos cases	Pos %	No. tested	Pos cases	Pos %	No. tested	Pos cases	Pos %	No. tested	Pos cases	Pos %	No. tested	Pos cases	Pos %	No. tested	Pos cases	Pos %	No. tested	Pos cases	Pos %	No. tested	Pos cases	Pos %	No. tested	Pos cases	Pos %	No. tested	Pos cases	Pos %	No. tested	Pos cases	Pos %	Total sample no.	Total Pos no.	Pos %
FluA/B Ag	FluA Ag	74	0	0	490	131	26.7347	6012	2775	46.1577	7339	3189	43.4528	4492	466	10.37	1853	97	5.23475	2116	318	15.0284	2334	434	18.5947	4619	1306	28.27	4861	813	16.72	5811	898	15.45	40001	10427	0.2607
	FluB Ag		0	0		13	2.65306		14	0.232868		7	0.0953808		5	0.11		2	0.107933		17	0.803403		55	2.35647		300	6.49		546	11.23		642	11.05		1601	0.04
	Throat swab
Resp 6+2 multiplex PCR	Adeno																185	6	3.24324	455	23	5.05495	997	13	1.30391	1134	27	2.38095	1287	33	2.5641	2116	144	6.80529	6174	246	0.0398445
	FluA																185	5	2.7027	455	12	2.63736	997	28	2.80843	1134	66	5.82011	1287	63	4.8951	2116	120	5.67108	6174	294	0.047619
	FluB																185	0	0	455	0	0	997	5	0.501505	1134	31	2.73369	1287	36	2.7972	2116	137	6.47448	6174	209	0.0338516
	P1																185	4	2.16216	455	3	0.659341	997	6	0.601805	1134	11	0.970018	1287	54	4.1958	2116	127	6.00189	6174	205	0.0332038
	P2																185	0	0	455	1	0.21978	997	3	0.300903	1134	2	0.176367	1287	1	0.0777001	2116	15	0.708885	6174	22	0.00356333
	P3																185	11	5.94595	455	18	3.95604	997	57	5.71715	1134	34	2.99824	1287	20	1.554	2116	66	3.11909	6174	206	0.0333657
	RSV																185	17	9.18919	455	54	11.8681	997	120	12.0361	1134	106	9.34744	1287	49	3.8073	2116	25	1.18147	6174	371	0.0600907
	HMPV																185	25	13.5135	455	60	13.1868	997	32	3.20963	1134	32	2.82187	1287	41	3.1857	2116	47	2.22117	6174	237	0.0383868
	Throat swab
MP qPCR	MP qPCR	248	7	2.82	186	7	3.76	499	5	1	735	30	4.08	724	49	6.77	771	121	15.69	812	190	23.4	924	228	24.68	1033	253	24.49	3184	1077	33.83	7934	2224	28.03	17050	4191	0.2458
	Throat swab
Covid-19 PCR	Covid-19 PCR	10164	1502	14.78	5325	208	3.91	1401	35	2.5	630	35	5.56	1954	901	46.11	1172	475	40.53	576	107	18.58	690	155	22.46	653	141	21.59	445	83	18.65	484	14	2.89	23494	3656	0.1556
